# Supplementary material for: Greenland Ice Sheet surface melt amplified by snowline migration and bare ice exposure
Source: PubMed Central journal article supplement — Sci Adv. 2019 Mar 6;5(3):eaav3738. doi: 10.1126/sciadv.aav3738 (PMC6402853; doi:10.1126/sciadv.aav3738), 2019-03-06
Supplement: aav3738_SM.pdf [file aav3738_SM.pdf]

## Supplementary Materials for

### Greenland Ice Sheet surface melt amplified by snowline migration and bare ice exposure

J. C. Ryan\*, L. C. Smith\*, D. van As, S. W. Cooley, M. G. Cooper, L. H Pitcher, A. Hubbard

\*Corresponding author. Email: jonathan\_ryan@brown.edu (J.C.R.); lsmith@geog.ucla.edu (L.C.S.)

Published 6 March 2019, *Sci. Adv.* 5, eaav3738 (2019)

DOI: 10.1126/sciadv.aav3738

#### This PDF file includes:

Fig. S1. Sensitivity of each IMBIE sector to the snowline-albedo feedback during the 2001–2017 study period.

Fig. S2. Difference between observed (MODIS) bare ice presence index and that modeled by RACMO2.3p2 and MAR3.9 in an average melt year (2005) and high melt year (2016).

Fig. S3. Example of random forests classification of bare ice and snow in West Greenland on 25 July 2016.

Fig. S4. Feature space occupied by water, land, bare ice, and snow in MOD09GA visible and near-infrared bands.

Fig. S5. Frequency of bare ice exposure (i.e., presence index) during summer 2012 in Southwest Greenland (IMBIE sector 6).

Fig. S6. Mean number of valid MODIS pixel observations across the Greenland Ice Sheet for each summer month between 2001 and 2017.

Fig. S7. Relationship between MODIS bare ice presence index with that derived from 21 AWSs situated across the Greenland Ice Sheet between 2009 and 2017.

Table S1. Maximum (or end-of-summer) snowline and bare ice extent for IMBIE sectors 1 to 4 between 2001 and 2017.

Table S2. Maximum (or end-of-summer) snowline elevation and bare ice extent for IMBIE sectors 5 to 8 between 2001 and 2017.

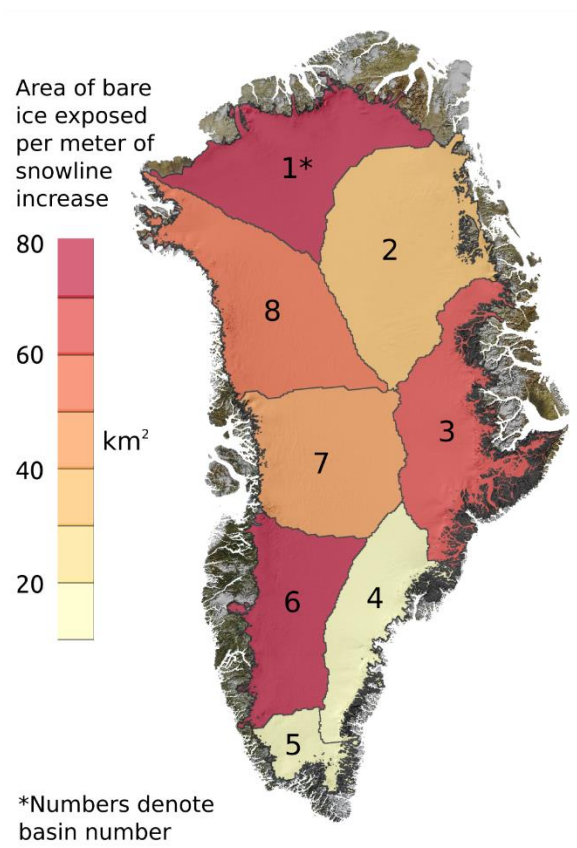

**Fig. S1. Sensitivity of each IMBIE sector to the snowline-albedo feedback during the 2001–2017 study period.**

The gently sloping topography of Southwest Greenland (IMBIE sector 6) makes it the most sensitive sector to snowline variability, averaging 78 km<sup>2</sup> of additional bare glacial ice exposure for every one-meter increase in snowline elevation. However, the surface topographic slopes of North, East, West and Northwest Greenland are nearly as flat as Southwest Greenland, signifying that the snowline-albedo feedback is an important control on melt from these sectors.

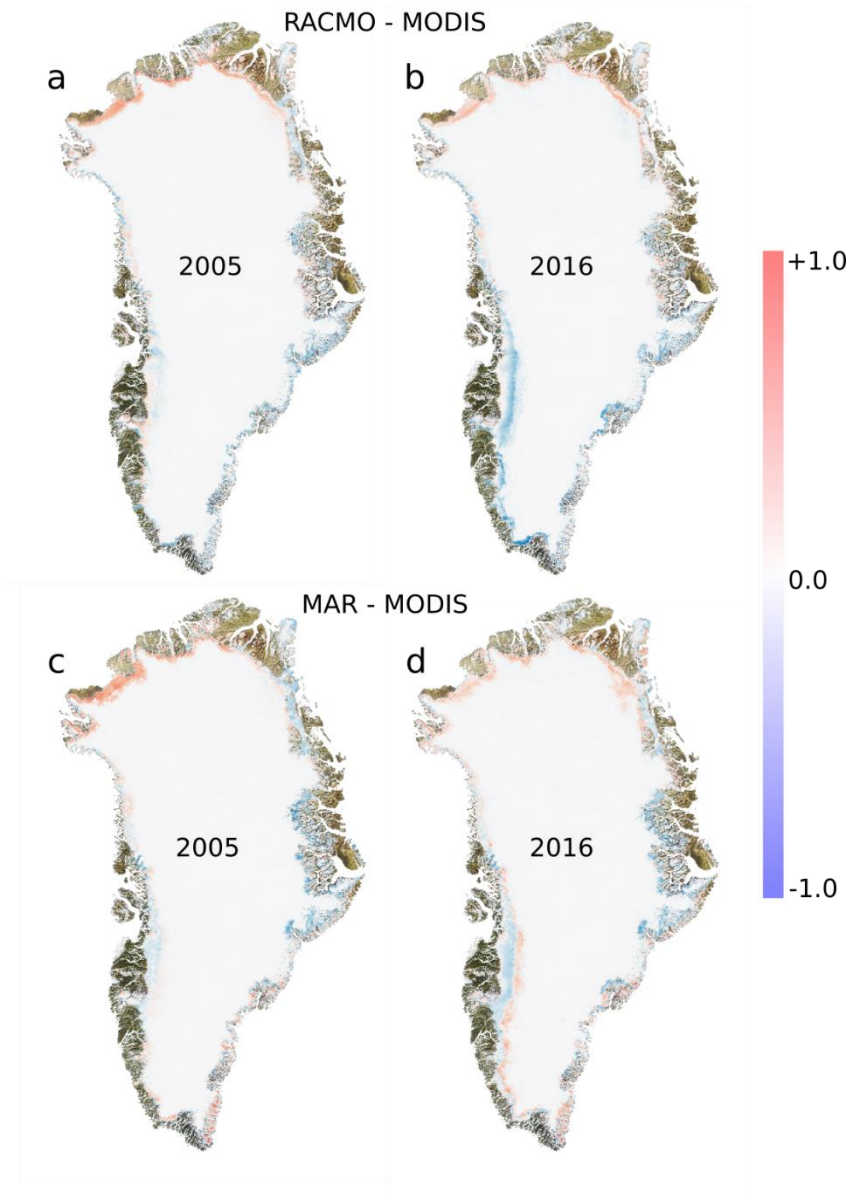

**Fig. S2. Difference between observed (MODIS) bare ice presence index and that modeled by RACMO2.3p2 and MAR3.9 in an average melt year (2005) and high melt year (2016).** A negative value (blue) indicates that bare ice duration or extent is underestimated by the models. (a) Difference between RACMO and MODIS in 2005, (b) difference between RACMO and MODIS in 2016, (c) difference between MAR and MODIS in 2005, and (d) difference between MAR and MODIS in 2016. We find that the difference between observed and modelled bare ice presence increases during high melt years.

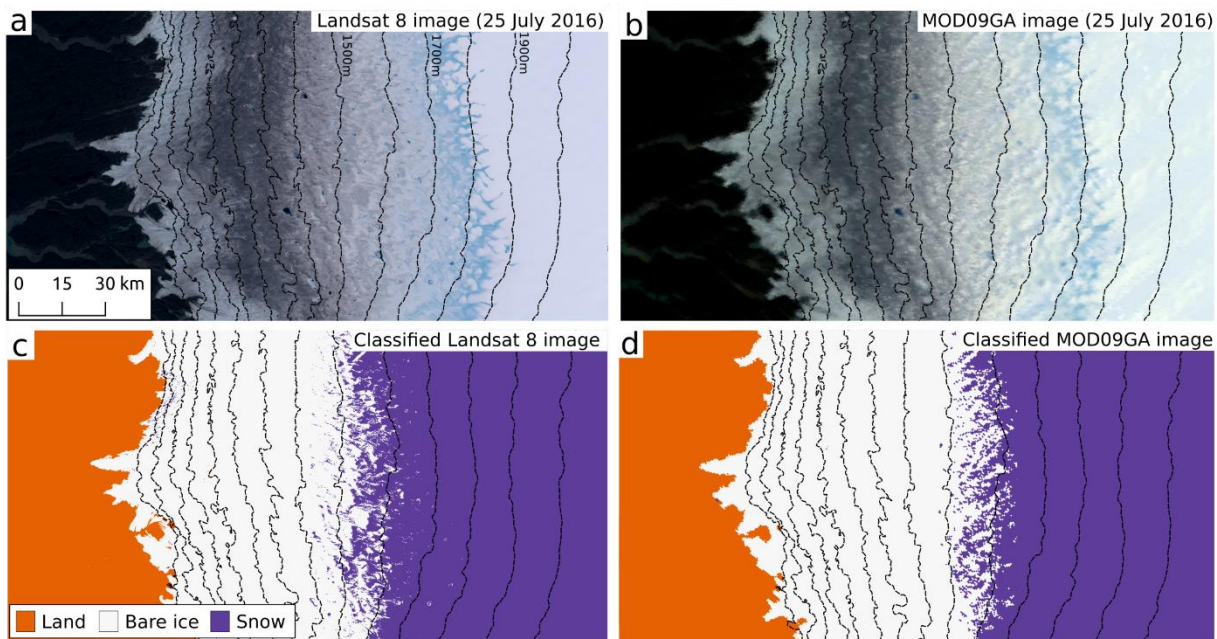

**Fig. S3. Example of random forests classification of bare ice and snow in West Greenland on 25 July 2016.** (a) Landsat 8 true color image with pixel resolution of 30 m. (b) MOD09GA true color image with pixel resolution of 500 m. (c) Classified Landsat 8 image with pixel resolution of 30 m. (d) Classified MOD09GA image. We find that bare ice is classified in MOD09GA images with an average accuracy of 97.8% based on comparison with Landsat imagery. We find errors of bare ice omission (i.e. bare ice incorrectly classified as snow) to be 4.6% and errors of bare ice commission (i.e. snow incorrectly classified as bare ice) to be 0.3%. The higher errors of omission may lead to a slight underestimation of the number of bare ice pixels and makes our bare ice extent and snowline metrics conservative.

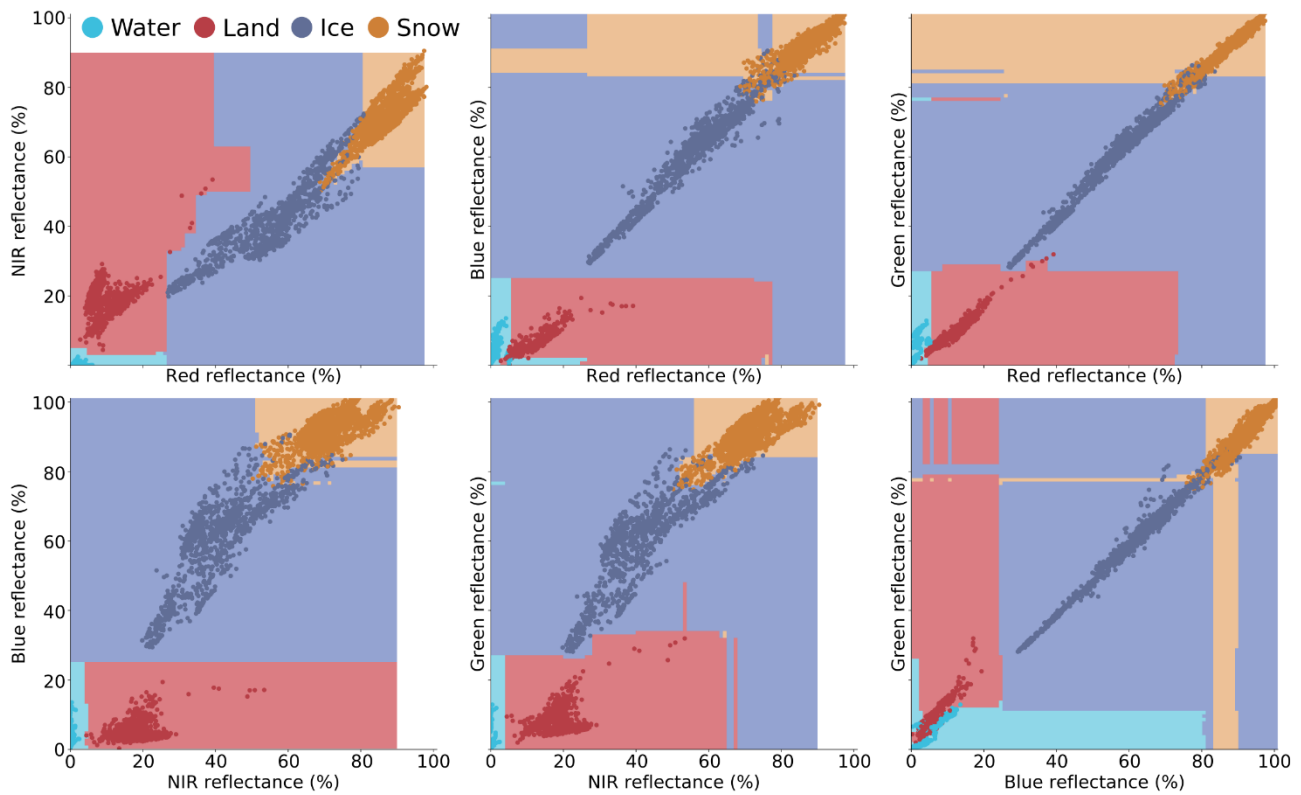

**Fig. S4. Feature space occupied by water, land, bare ice, and snow in MOD09GA visible and near-infrared bands.** Dots show the manually digitized pixel samples used to train the Random Forests classifier. The background shading shows the decision boundaries of the Random Forests classification. Snow and bare ice form are relatively easy to distinguish because they reflect different proportions of visible and near-infrared wavelengths and therefore form distinct clusters in the multi-dimensional feature space.

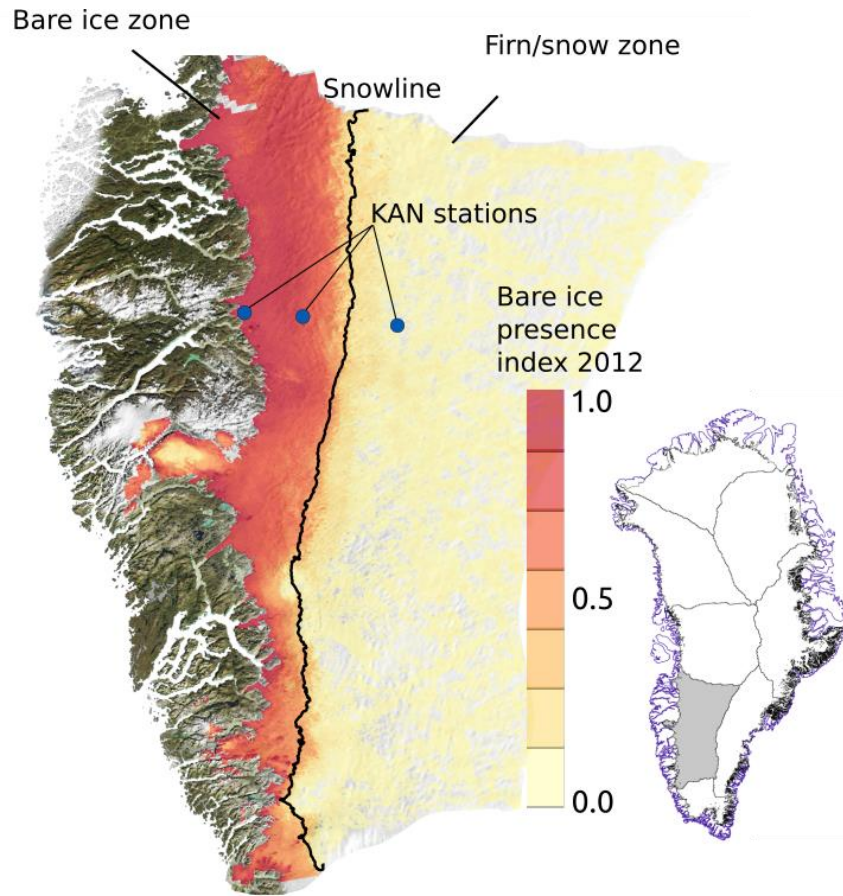

**Fig. S5. Frequency of bare ice exposure (i.e., presence index) during summer 2012 in Southwest Greenland (IMBIE sector 6).** The product was used to map the maximum snowline and extent of bare ice.

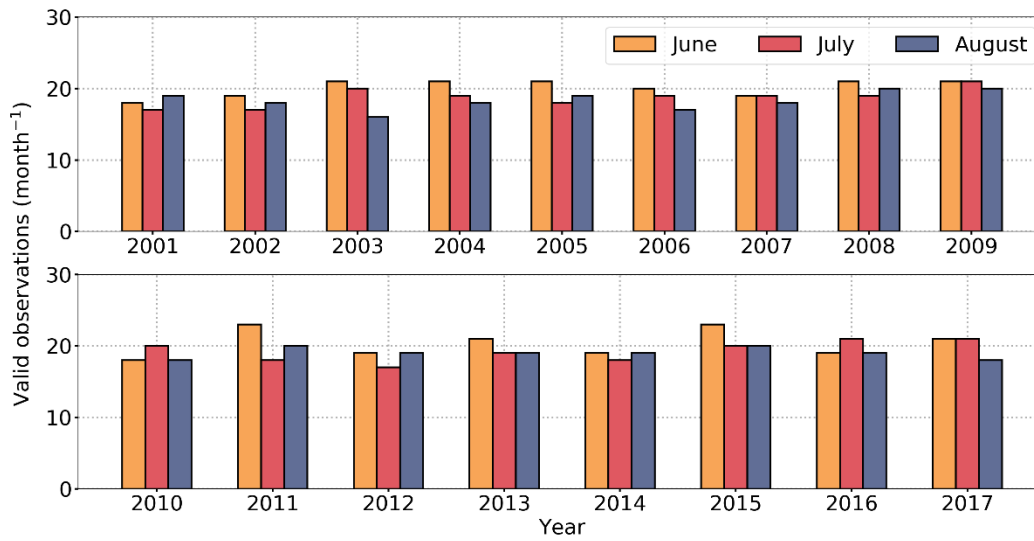

**Fig. S6. Mean number of valid MODIS pixel observations across the Greenland Ice Sheet for each summer month between 2001 and 2017.** The difference between the numbers of valid observations is small and cannot explain the patterns of bare ice presence or extent that we observe.



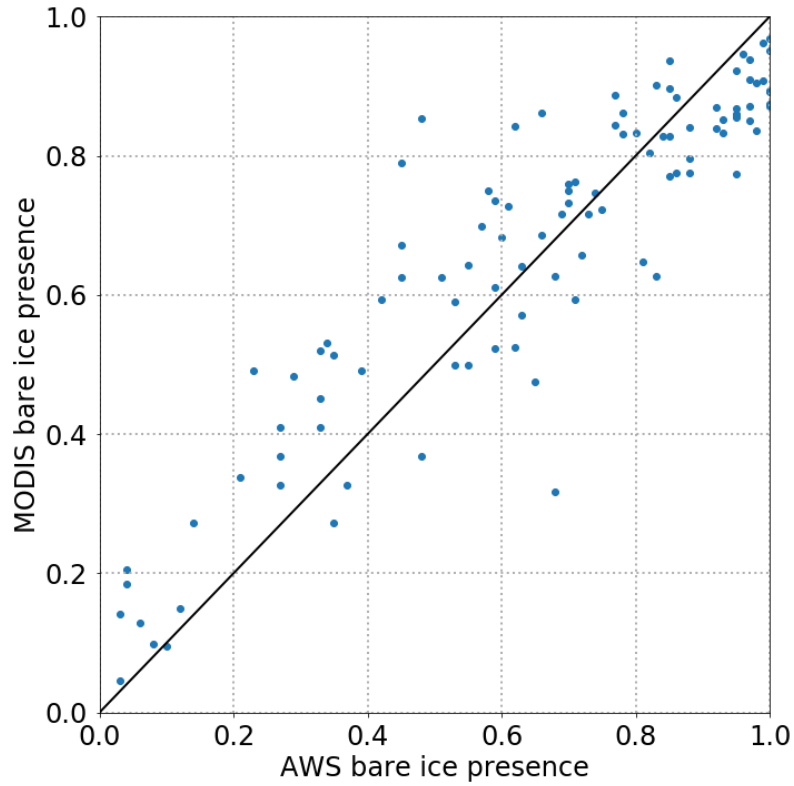

**Fig. S7. Relationship between MODIS bare ice presence index with that derived from 21 AWSs situated across the Greenland Ice Sheet between 2009 and 2017.** The strong correlation ( $R^2 = 0.82$ ) provides validation of our remotely sensed bare ice classification and presence index, especially considering AWS albedo contain inherent uncertainties due to small sampling footprints in comparison to MODIS and tilt.



**Table S1. Maximum (or end-of-summer) snowline and bare ice extent for IMBIE sectors 1 to 4 between 2001 and 2017.**

| Year | North (Sector 1)       |                                    | Northeast (Sector 2)   |                                    | East (Sector 3)        |                                    | Southeast (Sector 4)   |                                    |
|------|------------------------|------------------------------------|------------------------|------------------------------------|------------------------|------------------------------------|------------------------|------------------------------------|
|      | Snowline elevation (m) | Bare ice extent (km <sup>2</sup> ) | Snowline elevation (m) | Bare ice extent (km <sup>2</sup> ) | Snowline elevation (m) | Bare ice extent (km <sup>2</sup> ) | Snowline elevation (m) | Bare ice extent (km <sup>2</sup> ) |
| 2001 | 1,004                  | 23,464                             | 993                    | 18,720                             | 1,673                  | 23,858                             | 1,392                  | 8,208                              |
| 2002 | 1,005                  | 23,806                             | 1,041                  | 20,668                             | 1,698                  | 27,981                             | 1,311                  | 8,084                              |
| 2003 | 976                    | 22,725                             | 1,039                  | 20,098                             | 1,680                  | 22,371                             | 1,362                  | 6,505                              |
| 2004 | 896                    | 17,932                             | 1,078                  | 19,808                             | 1,709                  | 28,317                             | 1,343                  | 8,354                              |
| 2005 | 961                    | 21,910                             | 1,053                  | 20,232                             | 1,716                  | 32,367                             | 1,321                  | 9,779                              |
| 2006 | 852                    | 14,185                             | 874                    | 15,397                             | 1,685                  | 28,064                             | 1,319                  | 9,836                              |
| 2007 | 894                    | 17,693                             | 1,006                  | 18,618                             | 1,749                  | 33,531                             | 1,415                  | 11,271                             |
| 2008 | 1,033                  | 27,749                             | 1,047                  | 21,587                             | 1,677                  | 24,898                             | 1,361                  | 9,840                              |
| 2009 | 976                    | 22,465                             | 1,030                  | 19,247                             | 1,658                  | 23,491                             | 1,372                  | 9,477                              |
| 2010 | 961                    | 21,913                             | 1,068                  | 20,224                             | 1,732                  | 32,534                             | 1,407                  | 12,189                             |
| 2011 | 987                    | 23,982                             | 1,078                  | 20,203                             | 1,733                  | 31,320                             | 1,407                  | 11,343                             |
| 2012 | 1,050                  | 28,244                             | 1,159                  | 22,411                             | 1,784                  | 35,469                             | 1,522                  | 14,270                             |
| 2013 | 888                    | 12,485                             | 1,081                  | 19,259                             | 1,726                  | 29,951                             | 1,505                  | 9,374                              |
| 2014 | 1,004                  | 23,906                             | 979                    | 19,375                             | 1,674                  | 27,544                             | 1,546                  | 11,224                             |
| 2015 | 1,109                  | 32,301                             | 1,026                  | 18,595                             | 1,684                  | 22,181                             | 1,374                  | 7,777                              |
| 2016 | 1,053                  | 26,646                             | 1,095                  | 22,839                             | 1,757                  | 31,392                             | 1,537                  | 10,835                             |
| 2017 | 1,006                  | 19,779                             | 1,077                  | 20,725                             | 1,652                  | 20,804                             | 1,410                  | 9,216                              |

**Table S2. Maximum (or end-of-summer) snowline elevation and bare ice extent for IMBIE sectors 5 to 8 between 2001 and 2017.**

| Year | South (Sector 5)       |                                    | Southwest (Sector 6)   |                                    | West (Sector 7)        |                                    | Northwest (Sector 8)   |                                    |
|------|------------------------|------------------------------------|------------------------|------------------------------------|------------------------|------------------------------------|------------------------|------------------------------------|
|      | Snowline elevation (m) | Bare ice extent (km <sup>2</sup> ) | Snowline elevation (m) | Bare ice extent (km <sup>2</sup> ) | Snowline elevation (m) | Bare ice extent (km <sup>2</sup> ) | Snowline elevation (m) | Bare ice extent (km <sup>2</sup> ) |
| 2001 | 1,410                  | 10,682                             | 1,468                  | 39,873                             | 1,290                  | 11,856                             | 1,066                  | 18,512                             |
| 2002 | 1,286                  | 8,266                              | 1,368                  | 32,300                             | 1,293                  | 11,965                             | 1,075                  | 17,311                             |
| 2003 | 1,492                  | 11,589                             | 1,554                  | 47,254                             | 1,343                  | 13,784                             | 1,094                  | 20,557                             |
| 2004 | 1,410                  | 9,933                              | 1,498                  | 40,665                             | 1,374                  | 14,292                             | 1,067                  | 16,684                             |
| 2005 | 1,224                  | 7,198                              | 1,420                  | 33,986                             | 1,358                  | 13,845                             | 1,138                  | 20,164                             |
| 2006 | 1,414                  | 10,435                             | 1,422                  | 36,408                             | 1,316                  | 12,177                             | 1,110                  | 20,504                             |
| 2007 | 1,516                  | 12,221                             | 1,633                  | 54,688                             | 1,463                  | 17,567                             | 1,161                  | 23,761                             |
| 2008 | 1,490                  | 12,604                             | 1,529                  | 43,836                             | 1,331                  | 14,118                             | 1,121                  | 24,175                             |
| 2009 | 1,319                  | 8,659                              | 1,387                  | 33,977                             | 1,338                  | 13,362                             | 1,117                  | 24,358                             |
| 2010 | 1,562                  | 14,477                             | 1,622                  | 53,600                             | 1,441                  | 17,183                             | 1,190                  | 24,725                             |
| 2011 | 1,512                  | 12,892                             | 1,627                  | 55,497                             | 1,479                  | 18,625                             | 1,206                  | 28,202                             |
| 2012 | 1,609                  | 16,135                             | 1,779                  | 69,165                             | 1,569                  | 22,477                             | 1,354                  | 33,175                             |
| 2013 | 1,370                  | 9,563                              | 1,490                  | 42,709                             | 1,367                  | 14,889                             | 1,063                  | 15,003                             |
| 2014 | 1,469                  | 11,438                             | 1,549                  | 47,843                             | 1,411                  | 16,346                             | 1,178                  | 22,882                             |
| 2015 | 1,304                  | 7,973                              | 1,437                  | 33,184                             | 1,434                  | 16,671                             | 1,265                  | 31,012                             |
| 2016 | 1,551                  | 12,511                             | 1,648                  | 55,964                             | 1,485                  | 18,654                             | 1,159                  | 23,290                             |
| 2017 | 1,470                  | 11,455                             | 1,415                  | 37,245                             | 1,360                  | 14,172                             | 1,063                  | 17,437                             |
